# Supplementary material for: Downstream Neighbor of SON (DONSON) Expression Is Enhanced in Phenotypically Aggressive Prostate Cancers
Source: MDPI journal article supplement (doi:10.3390/cancers12113439), 2020-11-19
Supplement: s1 [file s1]

## Supplementary Materials

# Downstream Neighbor of SON (DONSON) Expression is Enhanced in Phenotypically Aggressive Prostate Cancers

Niklas Klümper, Marthe von Danwitz, Johannes Stein, Doris Schmidt, Anja Schmidt, Glen Kristiansen, Michael Muders, Michael Hölzel, Manuel Ritter, Abdullah Alajati and Jörg Ellinger

**Table S1.** Clinical-pathological characteristics of the Prostate Cancer TCGA Cohort.

| Prostate Cancer TCGA Cohort ( <i>n</i> = 498) |                     |           |
|-----------------------------------------------|---------------------|-----------|
| Clinical-Pathological Parameters              | Mean or Sample Size | Range     |
| Age                                           | 61.01               | 41–78     |
| Gleason                                       | 7.6                 | 6–10      |
| ISUP                                          | 3.2                 | 1–5       |
| Initial PSA                                   | 1.74                | 0.0–323.0 |
| <b>TNM Stage</b>                              | -                   | -         |
| ≥T3                                           | 301                 | -         |
| N+                                            | 79                  | -         |
| M+                                            | 3                   | -         |
| <b>Survival Endpoints</b>                     | -                   | -         |
| OS event                                      | 10                  | -         |
| Overall Survival (months)                     | 35.7                | 0–165     |
| PFS Events                                    | 29                  | -         |
| Progression-Free Survival (months)            | 31.7                | 0–165     |

**Table S2.** Clinical-pathological characteristics of the Bonn Prostate Cancer Tissue Microarray.

| Prostate Cancer Tissue Microarray ( <i>n</i> = 116) |                     |          |
|-----------------------------------------------------|---------------------|----------|
| Clinical-Pathological Parameters                    | Mean or Sample Size | Range    |
| Age                                                 | 65.25               | 45–83    |
| Gleason                                             | 6.9                 | 6–10     |
| ISUP                                                | 2.3                 | 1–5      |
| Initial PSA                                         | 10.3                | 0.7–58.4 |
| <b>TNM Stage</b>                                    | -                   | -        |
| ≥T3                                                 | 38                  | -        |
| N+                                                  | 12                  | -        |
| M+                                                  | 3                   | -        |
| <b>Survival Endpoints</b>                           | -                   | -        |
| OS Event                                            | 10                  | -        |
| Overall Survival (months)                           | 76.5                | 0–120*   |
| PFS Events                                          | 29                  | -        |
| Progression-Free Survival (months)                  | 60.5                | 0–120*   |

\*Endpoints OS and PFS are limited to 120 months follow up.

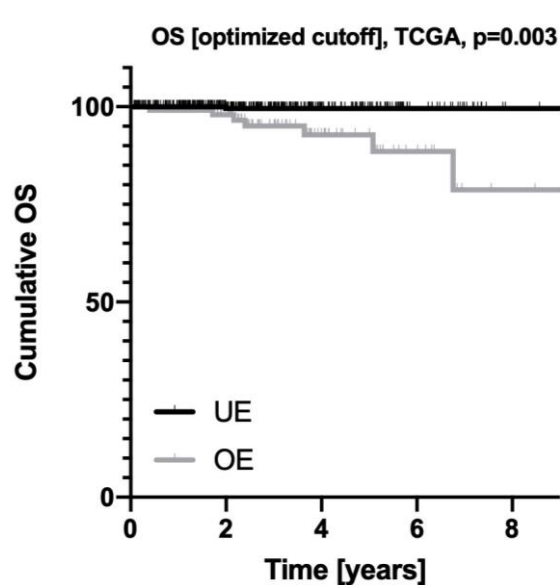

**Figure S1.** DONSON overexpression is associated with an unfavorable OS in the PCa TCGA cohort.

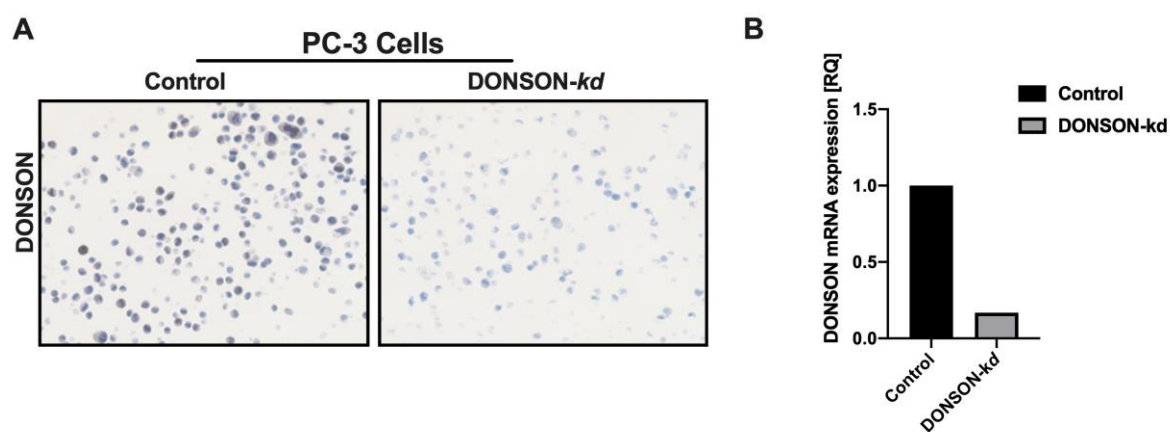

**Figure 2.** **A**, Immunocytochemical staining of DONSON in PC-3 control cells (NegA) compared to DONSON-knockdown. Images depicted in 10× objective magnification. **B**, The DONSON knockdown efficacy of the respective stained cells was confirmed via qPCR.

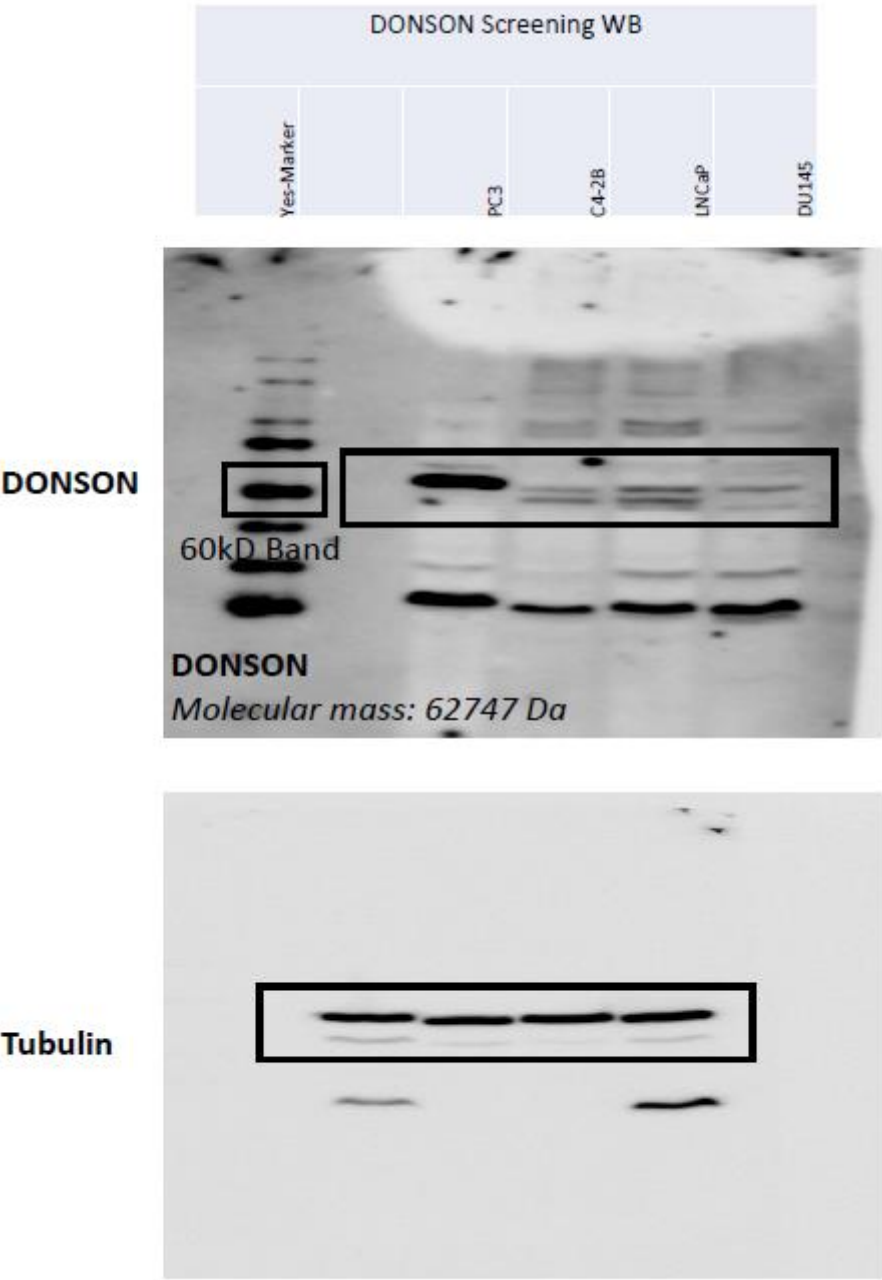

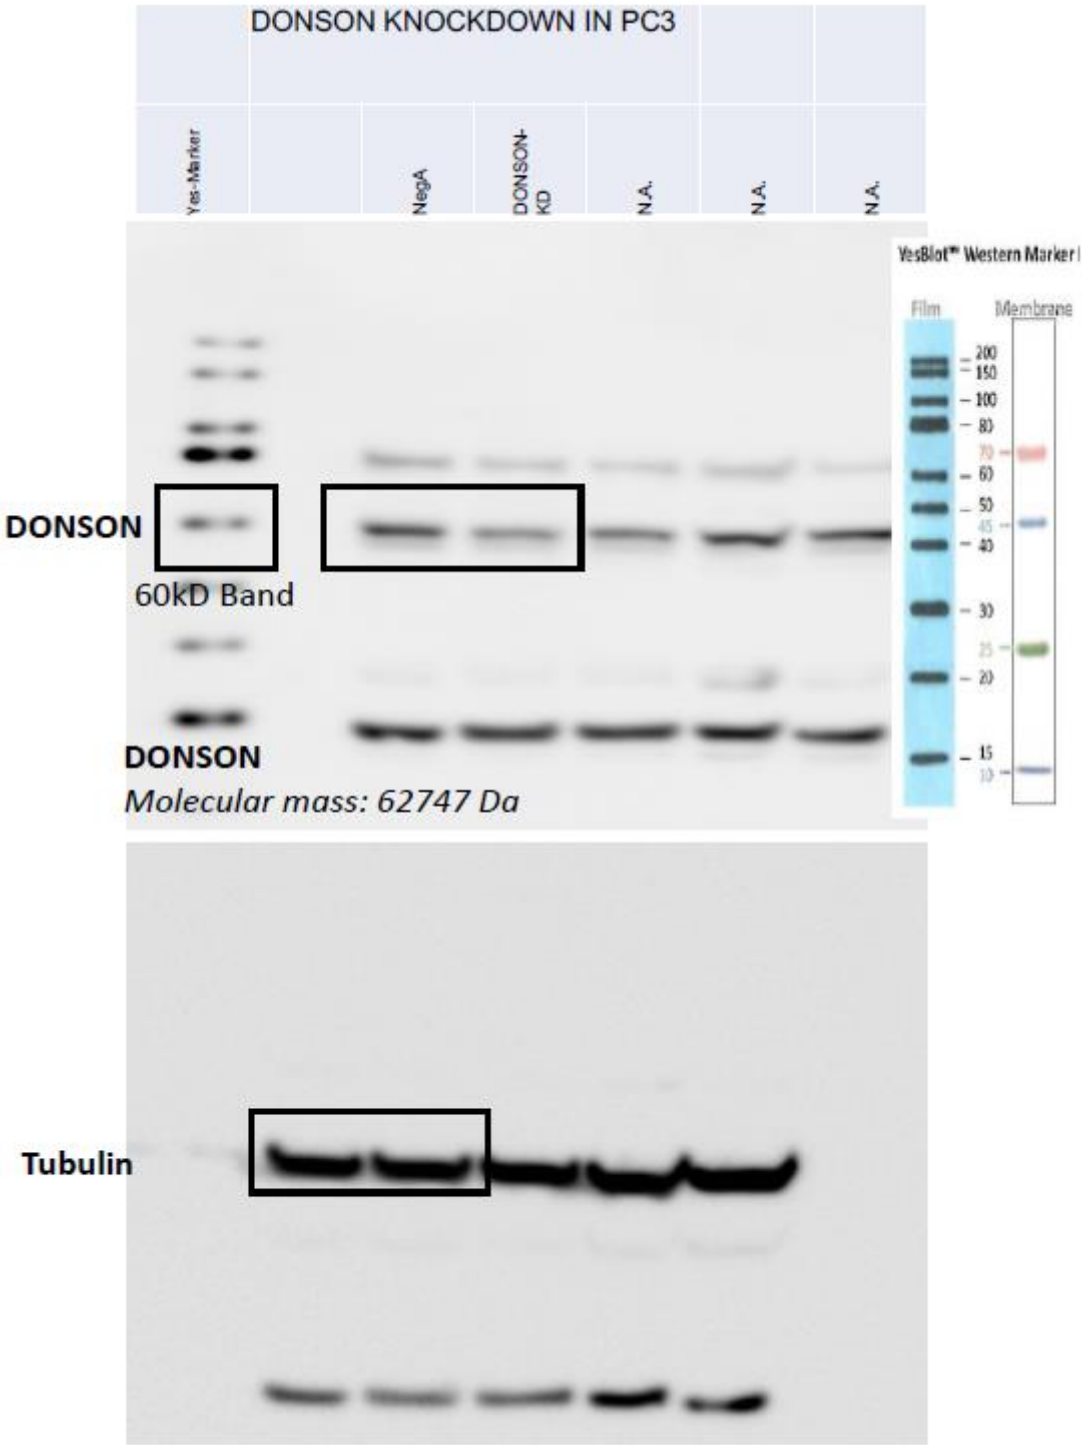

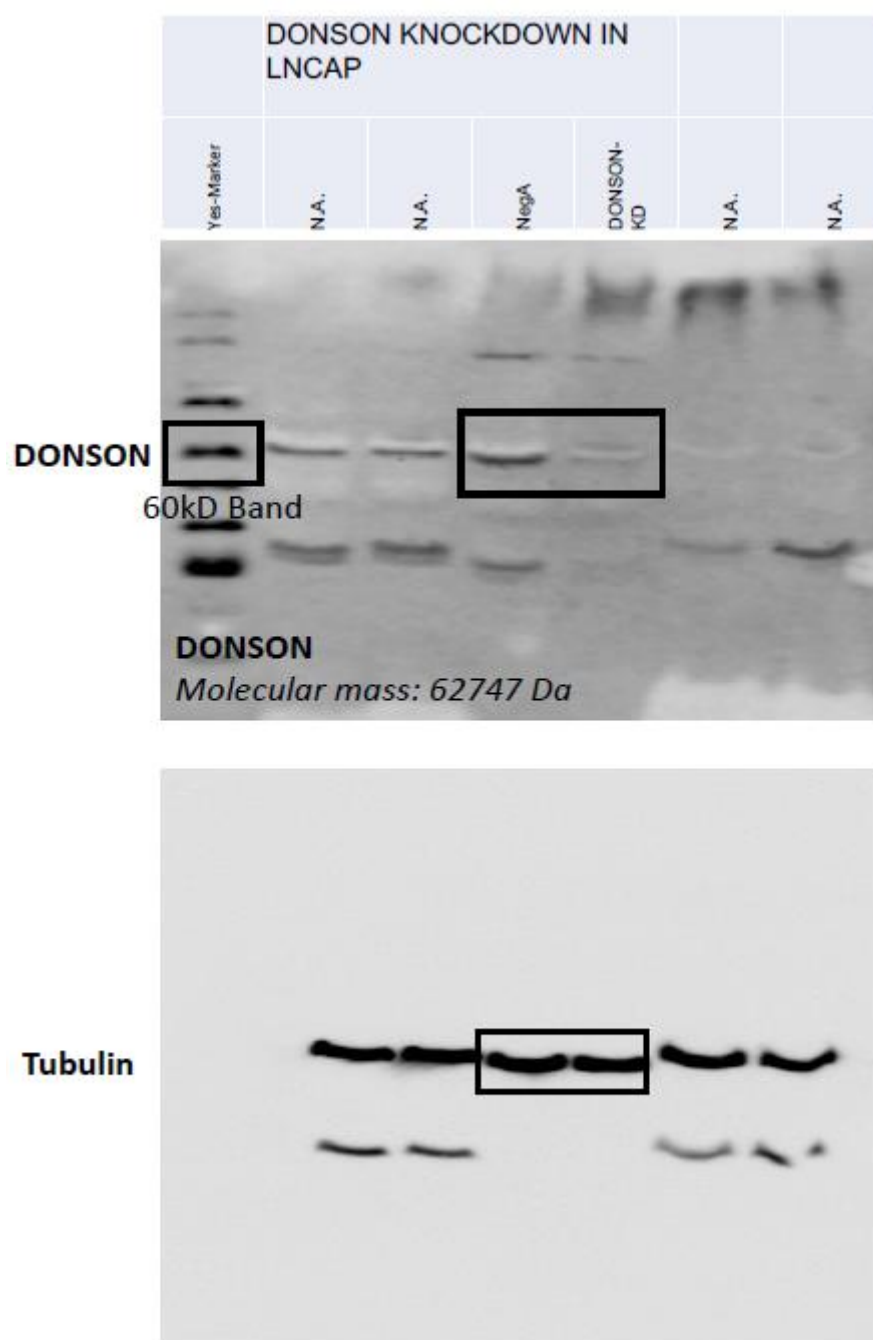

**Figure S3.** Uncropped Western Blot images.

**Publisher's Note:** MDPI stays neutral with regard to jurisdictional claims in published maps and institutional affiliations.

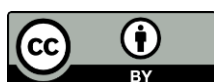

© 2020 by the authors. Licensee MDPI, Basel, Switzerland. This article is an open access article distributed under the terms and conditions of the Creative Commons Attribution (CC BY) license (<http://creativecommons.org/licenses/by/4.0/>).
